# Supplementary material for: Serum neurofilament light levels in normal aging and their association with morphologic brain changes
Source: PubMed Central journal article supplement (PMC7010701; doi:10.1038/s41467-020-14612-6), 2020-02-10
Supplement: 41467_2020_14612_MOESM1_ESM.pdf [file 41467_2020_14612_MOESM1_ESM.pdf]

## Reporting Summary

Nature Research wishes to improve the reproducibility of the work that we publish. This form provides structure for consistency and transparency in reporting. For further information on Nature Research policies, see [Authors & Referees](#) and the [Editorial Policy Checklist](#).

### Statistics

For all statistical analyses, confirm that the following items are present in the figure legend, table legend, main text, or Methods section.

n/a Confirmed

- The exact sample size ( $n$ ) for each experimental group/condition, given as a discrete number and unit of measurement
- A statement on whether measurements were taken from distinct samples or whether the same sample was measured repeatedly
- The statistical test(s) used AND whether they are one- or two-sided  
*Only common tests should be described solely by name; describe more complex techniques in the Methods section.*
- A description of all covariates tested
- A description of any assumptions or corrections, such as tests of normality and adjustment for multiple comparisons
- A full description of the statistical parameters including central tendency (e.g. means) or other basic estimates (e.g. regression coefficient) AND variation (e.g. standard deviation) or associated estimates of uncertainty (e.g. confidence intervals)
- For null hypothesis testing, the test statistic (e.g.  $F$ ,  $t$ ,  $r$ ) with confidence intervals, effect sizes, degrees of freedom and  $P$  value noted  
*Give  $P$  values as exact values whenever suitable.*
- For Bayesian analysis, information on the choice of priors and Markov chain Monte Carlo settings
- For hierarchical and complex designs, identification of the appropriate level for tests and full reporting of outcomes
- Estimates of effect sizes (e.g. Cohen's  $d$ , Pearson's  $r$ ), indicating how they were calculated

*Our web collection on [statistics for biologists](#) contains articles on many of the points above.*

### Software and code

Policy information about [availability of computer code](#)

Data collection

Data analysis

For manuscripts utilizing custom algorithms or software that are central to the research but not yet described in published literature, software must be made available to editors/reviewers. We strongly encourage code deposition in a community repository (e.g. GitHub). See the Nature Research [guidelines for submitting code & software](#) for further information.

### Data

Policy information about [availability of data](#)

All manuscripts must include a [data availability statement](#). This statement should provide the following information, where applicable:

- Accession codes, unique identifiers, or web links for publicly available datasets
- A list of figures that have associated raw data
- A description of any restrictions on data availability

The source data of key findings underlying Figs. 1, 2, 3, 4, 5 and Tables 2, 3, 4 are provided as Source Data file. All other data sets generated during and/or analyzed during the current study are available from the corresponding author upon reasonable request.

### Field-specific reporting

Please select the one below that is the best fit for your research. If you are not sure, read the appropriate sections before making your selection.

- Life sciences       Behavioural & social sciences       Ecological, evolutionary & environmental sciences

## Life sciences study design

All studies must disclose on these points even when the disclosure is negative.

|                 |                                                                                                                                                                                                                                                                                                                                                                                                                                                                                                                                                                                                                                                                                                                                                                                                                                                                                                                                                                                                                                                                                                                                                                                                                                                                                                                                                                                                                                                                                                                                                                                      |
|-----------------|--------------------------------------------------------------------------------------------------------------------------------------------------------------------------------------------------------------------------------------------------------------------------------------------------------------------------------------------------------------------------------------------------------------------------------------------------------------------------------------------------------------------------------------------------------------------------------------------------------------------------------------------------------------------------------------------------------------------------------------------------------------------------------------------------------------------------------------------------------------------------------------------------------------------------------------------------------------------------------------------------------------------------------------------------------------------------------------------------------------------------------------------------------------------------------------------------------------------------------------------------------------------------------------------------------------------------------------------------------------------------------------------------------------------------------------------------------------------------------------------------------------------------------------------------------------------------------------|
| Sample size     | Our investigation was based on data and material from the prospective and ongoing Austrian Stroke Prevention Family Study (ASPS-Fam), which is an extension of the Austrian Stroke Prevention Study (ASPS) that was established in 1991 (Schmidt, R. et al. Assessment of cerebrovascular risk profiles in healthy persons: definition of research goals and the Austrian Stroke Prevention Study (ASPS). <i>Neuroepidemiology</i> 13, 308–13 (1994); Schmidt, R., Fazekas, F., Kapeller, P., Schmidt, H. & Hartung, H. P. MRI white matter hyperintensities: three-year follow-up of the Austrian Stroke Prevention Study. <i>Neurology</i> 53, 132–9 (1999)). Between 2006 and 2013, study participants of the ASPS and their first-grade relatives were invited to enter ASPS-Fam. Inclusion criteria were no history of stroke or dementia and a normal neurological examination. The entire cohort underwent a thorough diagnostic work-up including clinical history taking, laboratory evaluation, cognitive testing, and an extended vascular risk factor assessment. Thus far the ASPS-Fam study comprises of 381 individuals from 169 families with MRI and blood samples available in 371 participants.<br>From all subjects, 103 agreed on a follow-up scan and the mean follow-up time was 5.59 years ( $\pm 0.97$ , min=3.99, max=6.94). A total of 8 follow-up cases were excluded for new onset stroke (n=3), heart disease (n=2), transient ischemic attack (n=1), brain hemorrhage (n=1) and orofacial dyskinesia (n=1) between baseline and follow-up assessment. |
| Data exclusions | Thirty-six subjects had to be excluded due to one or more of following exclusion criteria: diagnosis or suspicion of dementia (MMSE $\leq$ 24 or problems (failure of one task in the Mini-Cog test) of memory: n=11), visible brain infarcts on MRI (n=19), a history of stroke (n=9), other diseases (chronic myeloid leukemia) (n=1). This left a total of 335 participants to investigate sNFL in an aging population.<br>From all subjects, 103 agreed on a follow-up scan and the mean follow-up time was 5.59 years ( $\pm 0.97$ , min=3.99, max=6.94). A total of 8 follow-up cases were excluded for new onset stroke (n=3), heart disease (n=2), transient ischemic attack (n=1), brain hemorrhage (n=1) and orofacial dyskinesia (n=1) between baseline and follow-up assessment.                                                                                                                                                                                                                                                                                                                                                                                                                                                                                                                                                                                                                                                                                                                                                                                         |
| Replication     | From the 335 included participants, 103 agreed on a follow-up scan and the mean follow-up time was 5.59 years                                                                                                                                                                                                                                                                                                                                                                                                                                                                                                                                                                                                                                                                                                                                                                                                                                                                                                                                                                                                                                                                                                                                                                                                                                                                                                                                                                                                                                                                        |
| Randomization   | Randomization was not relevant for this study.                                                                                                                                                                                                                                                                                                                                                                                                                                                                                                                                                                                                                                                                                                                                                                                                                                                                                                                                                                                                                                                                                                                                                                                                                                                                                                                                                                                                                                                                                                                                       |
| Blinding        | All analysis have been performed by trained coworkers, blindend to clinical informtion.                                                                                                                                                                                                                                                                                                                                                                                                                                                                                                                                                                                                                                                                                                                                                                                                                                                                                                                                                                                                                                                                                                                                                                                                                                                                                                                                                                                                                                                                                              |

## Reporting for specific materials, systems and methods

We require information from authors about some types of materials, experimental systems and methods used in many studies. Here, indicate whether each material, system or method listed is relevant to your study. If you are not sure if a list item applies to your research, read the appropriate section before selecting a response.

### Materials & experimental systems

| n/a                                 | Involved in the study                                           |
|-------------------------------------|-----------------------------------------------------------------|
| <input type="checkbox"/>            | <input checked="" type="checkbox"/> Antibodies                  |
| <input checked="" type="checkbox"/> | <input type="checkbox"/> Eukaryotic cell lines                  |
| <input checked="" type="checkbox"/> | <input type="checkbox"/> Palaeontology                          |
| <input checked="" type="checkbox"/> | <input type="checkbox"/> Animals and other organisms            |
| <input type="checkbox"/>            | <input checked="" type="checkbox"/> Human research participants |
| <input type="checkbox"/>            | <input checked="" type="checkbox"/> Clinical data               |

### Methods

| n/a                                 | Involved in the study                                      |
|-------------------------------------|------------------------------------------------------------|
| <input checked="" type="checkbox"/> | <input type="checkbox"/> ChIP-seq                          |
| <input checked="" type="checkbox"/> | <input type="checkbox"/> Flow cytometry                    |
| <input type="checkbox"/>            | <input checked="" type="checkbox"/> MRI-based neuroimaging |

## Antibodies

|                 |                                                                                                                                                                                                                                                                                                                                                                                                                                                                                                                                                                                                                                                                                                                                                                                                                                                                                                                                                                                                                                                                                                          |
|-----------------|----------------------------------------------------------------------------------------------------------------------------------------------------------------------------------------------------------------------------------------------------------------------------------------------------------------------------------------------------------------------------------------------------------------------------------------------------------------------------------------------------------------------------------------------------------------------------------------------------------------------------------------------------------------------------------------------------------------------------------------------------------------------------------------------------------------------------------------------------------------------------------------------------------------------------------------------------------------------------------------------------------------------------------------------------------------------------------------------------------|
| Antibodies used | All serum samples were analyzed at the University Hospital Basel, Switzerland by board certified technicians blinded to clinical or paraclinical information. Serum NfL levels were determined by single molecule array (Simoa) assay using the capture monoclonal antibody (mAb) 47:3 and the biotinylated detector mAb 2:1 from UmanDiagnostica (Norgren, N., Karlsson, J.-E., Rosengren, L. & Stigbrand, T. Monoclonal antibodies selective for low molecular weight neurofilaments. <i>Hybrid. Hybridomics</i> 21, 53–9 (2002)) transferred onto the Simoa platform as previously described (Disanto, G. et al. Serum Neurofilament light: A biomarker of neuronal damage in multiple sclerosis. <i>Ann. Neurol.</i> 81, 857–870 (2017)).                                                                                                                                                                                                                                                                                                                                                            |
| Validation      | Recovery rates $([\text{concentration of spiked sample} - \text{concentration of native sample}]/\text{spiked concentration} \times 100)$ were tested in 4 serum and 4 CSF samples from HC spiked with 5, 50, and 200pg/ml and 500 and 2,000pg/ml of NfL, respectively. The mean recovery after spiking was 107% for serum and 121% for CSF. Parallelism and linearity of the assay for serum and CSF were confirmed by serial dilution experiments (Disanto, G. et al. Serum Neurofilament light: A biomarker of neuronal damage in multiple sclerosis. <i>Ann. Neurol.</i> 81, 857–870 (2017); Valentin, MA. et al. Validation of immunoassay for protein biomarkers: bioanalytical study plan implementation to support pre-clinical and clinical studies. <i>J Pharm Biomed Anal.</i> 55, 869–877 (2011). The used monoclonal antibodies have proven to be highly specific in NfL knock-out animal experiments (Bacioglu, M. et al. Neurofilament light chain in blood and CSF as marker of disease progression in mouse models and in neurodegenerative diseases. <i>Neuron.</i> 91, 56–66 (2016)). |

## Human research participants

Policy information about [studies involving human research participants](#)

|                            |                                                                                                                                                                                                                                                                                                                         |
|----------------------------|-------------------------------------------------------------------------------------------------------------------------------------------------------------------------------------------------------------------------------------------------------------------------------------------------------------------------|
| Population characteristics | We analyzed participants from the prospective and ongoing Austrian Stroke Prevention Family Study (ASPS-Fam), which is an extension of the Austrian Stroke Prevention Study (ASPS) that was established in 1991 (see above). Mean age was 64.85 years, and the cohort consisted of 195 female and 140 male individuals. |
| Recruitment                | Participants were randomly recruited based on the official registry of residents of city of Graz, Austria, between 1991 and 1994. Between 2006 and 2013, study participants of the ASPS and their first-grade relatives were invited to enter ASPS-Fam.                                                                 |
| Ethics oversight           | The study protocol was approved by the ethics committee of the Medical University of Graz, Austria, and written informed consent was obtained from all participants.                                                                                                                                                    |

Note that full information on the approval of the study protocol must also be provided in the manuscript.

## Clinical data

Policy information about [clinical studies](#)

All manuscripts should comply with the ICMJE [guidelines for publication of clinical research](#) and a completed [CONSORT checklist](#) must be included with all submissions.

|                             |                                                                                                                         |
|-----------------------------|-------------------------------------------------------------------------------------------------------------------------|
| Clinical trial registration | Retrospective analysis of the ASPS-Family, supported by Austrian Science Fund P20545-P05, P13180 and I904-B13 (Era-Net) |
| Study protocol              | MRI, cognitive testing, and cardiovascular risk factor assessment                                                       |
| Data collection             | Data used for the current study were collected between 2006 and 2013                                                    |
| Outcomes                    | <i>Describe how you pre-defined primary and secondary outcome measures and how you assessed these measures.</i>         |

## Magnetic resonance imaging

### Experimental design

|                                 |                                       |
|---------------------------------|---------------------------------------|
| Design type                     | Structural analysis and visual rating |
| Design specifications           | -                                     |
| Behavioral performance measures | -                                     |

### Acquisition

|                               |                                                                                                                                                                                     |
|-------------------------------|-------------------------------------------------------------------------------------------------------------------------------------------------------------------------------------|
| Imaging type(s)               | Structural                                                                                                                                                                          |
| Field strength                | 3T                                                                                                                                                                                  |
| Sequence & imaging parameters | T1 MPRAGE at 1mm isotropic in-plane resolution (TR=1900ms, TE=2.19ms, TI=900ms, FA=9°), axial T2w-FLAIR (TR=10s, TE=69ms, TI=2500ms, number of slices=40, resolution=0.86x0.86x3mm) |
| Area of acquisition           | whole brain                                                                                                                                                                         |
| Diffusion MRI                 | <input type="checkbox"/> Used <input checked="" type="checkbox"/> Not used                                                                                                          |

### Preprocessing

|                            |                                                                                                                      |
|----------------------------|----------------------------------------------------------------------------------------------------------------------|
| Preprocessing software     | No specific preprocessing was used. For SIENA/X neck-cutting was applied.                                            |
| Normalization              | No specific normalization was applied.                                                                               |
| Normalization template     | SIENAX uses an affine-registration to the MNI152 template in order to normalise for head size                        |
| Noise and artifact removal | visual inspection to exclude scans with motion artifacts                                                             |
| Volume censoring           | <i>Define your software and/or method and criteria for volume censoring, and state the extent of such censoring.</i> |

### Statistical modeling & inference

|                         |   |
|-------------------------|---|
| Model type and settings | - |
| Effect(s) tested        | - |

Specify type of analysis:  Whole brain  ROI-based  Both

Statistic type for inference  
(See [Eklund et al. 2016](#))

Correction

## Models & analysis

- | n/a                                 | Involvement in the study                                              |
|-------------------------------------|-----------------------------------------------------------------------|
| <input checked="" type="checkbox"/> | <input type="checkbox"/> Functional and/or effective connectivity     |
| <input checked="" type="checkbox"/> | <input type="checkbox"/> Graph analysis                               |
| <input checked="" type="checkbox"/> | <input type="checkbox"/> Multivariate modeling or predictive analysis |
